# Supplementary material for: Contribution of m5C RNA Modification-Related Genes to Prognosis and Immunotherapy Prediction in Patients with Ovarian Cancer
Source: Hindawi journal article supplement (doi:10.1155/2023/1400267), 2023-11-13
Supplement: f2 [file 1400267.f2.pdf]

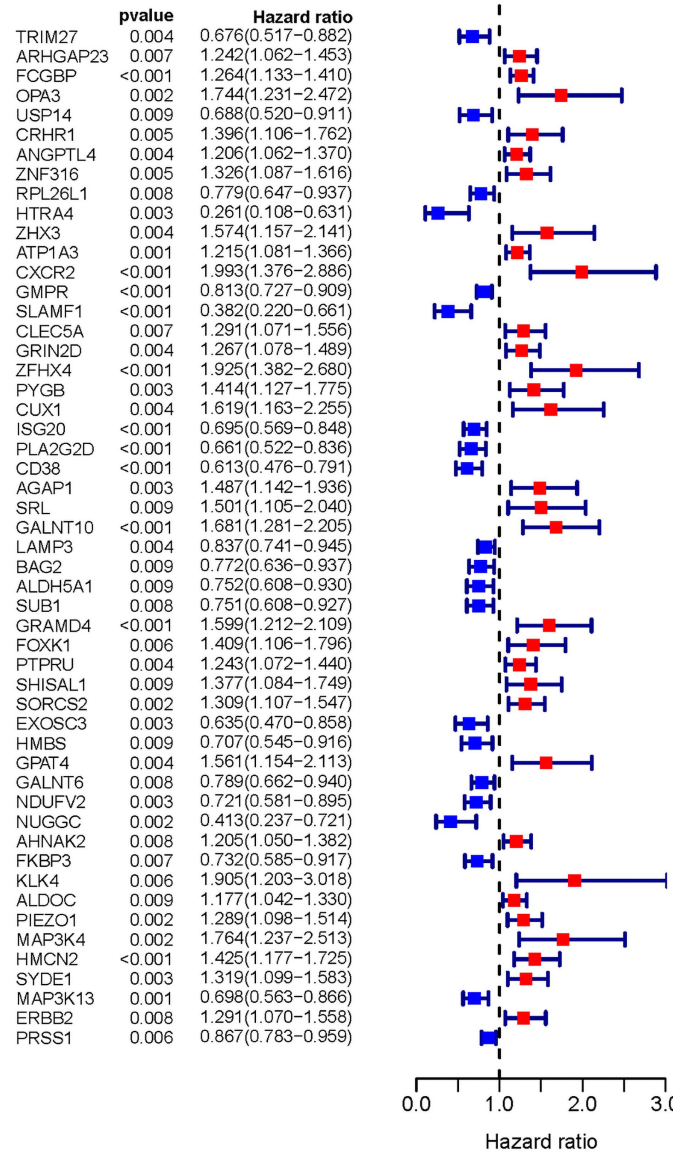

Additional file 2: Figure S1. The forest plot of m5C RNA modification-related genes correlated with survival time.
