# Supplementary material for: Contribution of m5C RNA Modification-Related Genes to Prognosis and Immunotherapy Prediction in Patients with Ovarian Cancer
Source: Hindawi journal article supplement (doi:10.1155/2023/1400267), 2023-11-13
Supplement: f3 [file 1400267.f3.pdf]

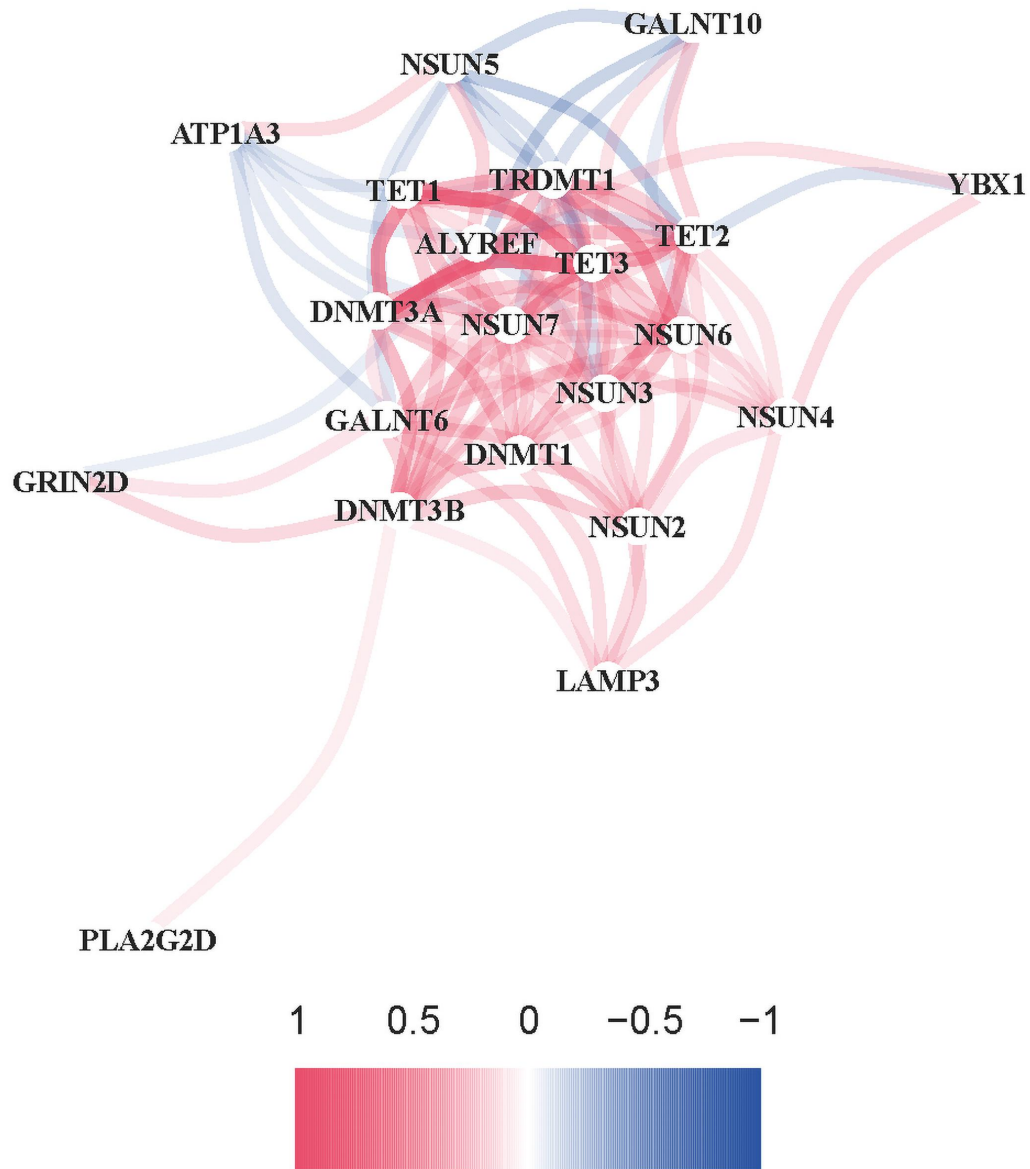

Additional file 3: Figure S2. The slightly positive correlation between PLA2G2D and m5C RNA modification regulators.
